# Supplementary material for: LncRNA-mRNA Co-Expression Analysis Identifies AL133346.1/CCN2 as Biomarkers in Pediatric B-Cell Acute Lymphoblastic Leukemia
Source: PubMed Central journal article supplement (PMC7765782; doi:10.3390/cancers12123803), 2020-12-17
Supplement: cancers-12-03803-s001.pdf [file cancers-12-03803-s001.pdf]

**Supplementary materials: Lncrna-mrna Co-Expression Analysis Identifies**

**AL133346.1/CCN2 as Biomarkers in Pediatric B-Cell Acute Lymphoblastic Leukemia**

**Marta Cuadros, Daniel J. García, Alvaro Andrades, Alberto M. Arenas, Isabel F. Coira, Carlos Baliñas-Gavira, Paola Peinado, María I. Rodríguez, Juan Carlos Álvarez-Pérez, Francisco Ruiz-Cabello, Mireia Camós, Antonio Jiménez-Velasco and Pedro P. Medina**

**Table S1.** 48 lncRNAs, represented by 50 probes, that were differentially expressed between pediatric B-ALL vs. healthy bone marrow samples<sup>4</sup>. Overexpressed lncRNAs are in red and downregulated lncRNAs are in green. The lncRNAs are ranked by fold change (FC). FDR: false discovery rate.

| GeneName      | FC         | P-Value     | FDR         | seqname         | source         | Probe sequence                                  |
|---------------|------------|-------------|-------------|-----------------|----------------|-------------------------------------------------|
| XLOC_007191   | 7.0108201  | 0.000330928 | 0.012455896 | TCONS_00015148  | Cabili et al   | AGCTGCCTGCTTAGAAGGACTTTGGAAGCAAGACAGAGCAGTGTCT  |
| PCNA-AS1      | 6.8685316  | 6.63E-05    | 0.003170658 | NR_028370       | RefSeq         | GAAAGACAACGACCCTCTGCTACGCCTGCAACCGTTAATGCCGC    |
| AL133346.1    | 5.1548851  | 2.32E-05    | 0.001477978 | ENST00000435287 | gencode        | GTAACCTGGACAACCTGAGGCATTAATTGAGGATCAATATGATGAC  |
| HCP5          | 4.4955343  | 4.06E-05    | 0.002302832 | NR_040662       | RefSeq         | GCCCTGAGGCAAACATGAATTAAGTGTGTGGATCCCACATGAA     |
| LOC144481     | 4.1514389  | 4.28E-06    | 0.000436973 | uc001tcu.3      | UCSC_knowngene | TATTTTACCACAGGTACCAATCACCTCCAGATCTAAGAATGGCTT   |
| RP11-334C17.5 | 4.0109666  | 0.000581137 | 0.017794409 | ENST00000573346 | gencode        | GGACCACTGCCTGCACGCCTTGGTCAAAAACAAAGCCACACACCAGA |
| OMG           | 3.6061205  | 0.00101954  | 0.028380288 | ENST00000584094 | gencode        | CAACTGCCTGCATTCTTATCTCAGTTTCTTATTATTGCTGAATGAC  |
| RP1-159A19.4  | 3.1364878  | 0.000534767 | 0.017275697 | ENST00000443579 | gencode        | GGTTTGAATGTACTACTGAGTGGTCTTCATAAATTACCTCTCTGC   |
| RP11-164H13.1 | 3.0092288  | 8.38E-06    | 0.000725088 | ENST00000553445 | gencode        | TTCAGCCTGTGACTGCCACCAGAGATGTCTTCTGCGGCTAGCTG    |
| LOC100130476  | 2.8915131  | 1.81E-05    | 0.001206789 | NR_049793       | RefSeq         | CTGATGTAAGTGTCTTGTTCATCTTGCTGCCAGGATTTGTGACAAG  |
| RP11-356I2.4  | 2.8562064  | 0.000568603 | 0.017765957 | ENST00000448942 | gencode        | CTCACTTCATAAGAGCAGTAAACACTAAACCAAGGGAATGTGAATT  |
| LOC100887755  | 2.7318975  | 0.0008791   | 0.025394391 | NR_051976       | RefSeq         | GGATGCCTGCTACTGTCCTGTTGTCATTAGATAATTAATGAACATA  |
| PTENP1        | 2.6858211  | 5.15E-05    | 0.002627005 | NR_023917       | RefSeq         | TGTGAATGCTTCATGTGCTGCCTGCAAGCTTCTTTTTTCTCATTAA  |
| TRAF3IP2-AS1  | 2.6169707  | 0.000458242 | 0.015590427 | NR_034110       | RefSeq         | TCAAGAAGATCAGAACAGGCTTAAATTGATGCTATAAAACCAATTA  |
| CTD-2012K14.7 | 2.3007983  | 0.0001698   | 0.007427541 | ENST00000562846 | gencode        | GACCGTTCGGTGTGAGAATGCTGGCCCAATAACATACTCTTTTTT   |
| MYLK-AS1      | 2.0228068  | 8.91E-05    | 0.004135494 | NR_038266       | RefSeq         | GAATGACTTTGTGACCAGCAGCTTAAGCCAAATAAACTTTATAAGG  |
| PHBP11        | 1.9510706  | 0.000941069 | 0.02668106  | ENST00000420550 | gencode        | ACAGAAACCAATTATCTTTGACTGCCGTTCTCGACCACGTAAGTG   |
| RP11-164H13.1 | 1.9465779  | 1.04E-05    | 0.000773313 | ENST00000547644 | gencode        | ACCATACATCAGTCATCTGGCAGCAGCTCGAGAAGCATGTCCTCCA  |
| RAB11B-AS1    | 1.895501   | 0.001389946 | 0.036067912 | NR_038237       | RefSeq         | TCACTTTTTAAAACAAACTGAGGGTAACTACTAGATCTGTGAACT   |
| RP5-1061H20.3 | 1.7178744  | 0.001668236 | 0.040540785 | ENST00000434404 | gencode        | AGAGCGGCAGGTGGGGGCGTTGGGGGCTGAGTCCCGATTCCCTGA   |
| RPL13AP20     | 1.5736643  | 0.000422041 | 0.015089406 | NR_003932       | RefSeq         | AGAAGAAAATTGACAAATACACAGAAGTCTCAAGACCCACGGACT   |
| RP11-807H22.6 | -13.874405 | 0.000150882 | 0.006794133 | ENST00000539482 | gencode        | CCCTGGGGTCTTCCGACAACCTATCCTAATAGACAAATCCACATG   |
| CXCR2P1       | -5.7957804 | 0           | 0           | NR_002712       | RefSeq         | GTACTTTTGCCAAAGAACCAAGGCTGAAATTTCTTGCTAAATGAGA  |
| BC127858      | -4.4412668 | 1.19E-09    | 0.00000026  | uc002zti.1      | UCSC_knowngene | AAACACCCAAGTGTAGGAACCAGAATAATCAGCCCTAATAGAGGG   |

|               |            |             |             |                 |              |                                                 |
|---------------|------------|-------------|-------------|-----------------|--------------|-------------------------------------------------|
| LINC00152     | -3.90121   | 0.000000062 | 0.000010547 | NR_024206       | RefSeq       | TTGAATAACTGGGAGATGAAACAGGAAGCTCTATGACACACTTGAT  |
| ACTN1-AS1     | -3.6890357 | 7.00E-11    | 0.000000027 | ENST00000553944 | gencode      | TCTAAACTGTGGCTCTAAACCTAACACAGAGGGTAATGGTAGTGCT  |
| RP11-124N14.4 | -3.520628  | 3.96E-06    | 0.000433239 | ENST00000437232 | gencode      | TGTTTCGAAGTCGATGCAAAAAATGAGTTGCTTATTCAGTCTCTC   |
| RP11-51B10.4  | -3.3449726 | 0.000444639 | 0.015471426 | ENST00000451920 | gencode      | TGCAGGGACCTCTTATCATCCATGGCAAGGATGCCTTCCCCAGA    |
| AC092214.10   | -2.7754398 | 1.30E-10    | 0.000000004 | ENST00000421648 | gencode      | AGTGTGTATTAGATAACAAGCCTTTATCTCAATACCTTCCTTACCC  |
| ACTR3P2       | -2.707763  | 0.000213907 | 0.008851145 | ENST00000439585 | gencode      | TGAGTGGCAGTAGATTGAAGCCAAAATCTATTGATGTACAAGTCGT  |
| RP11-366L20.4 | -2.5473442 | 2.20E-10    | 0.000000056 | ENST00000536217 | gencode      | GGTTTCCTGTTCTTTTGTCTTCTGGAAAATACAGACCTACAAAGC   |
| XLOC_000218   | -2.4826843 | 1.00E-11    | 0.000000005 | TCONS_00000959  | Cabili et al | CATCTTAGTGTGACTAAAAGAGGGAGATCCTAAAGAATTTCAAGGA  |
| GYG1P1        | -2.4041661 | 4.72E-08    | 0.000009027 | ENST00000460864 | gencode      | CAAAAAGTGTCAAAAGTGATTTCCCATGATCCCAACATAACTTATCC |
| HMGN2P36      | -2.3071326 | 0.000199267 | 0.008474388 | ENST00000529541 | gencode      | GAGATGCCAAGTGAAGTATGTGCATTTTTGATAACTGTGCACTCCT  |
| RP11-393K10.1 | -2.2373338 | 0           | 0           | ENST00000431627 | gencode      | GCACAATATCAAGTGTGAGGAAGGAGATAAGTTTTGATTATTCTGC  |
| HMGN2P5       | -2.2154239 | 0.001250201 | 0.033579954 | ENST00000436882 | gencode      | CCAAAACAGACCAGGCACAGAAAGCTGAAGGTGCTGGAGATGCCAA  |
| RP5-1042I8.7  | -2.0775564 | 1.40E-05    | 0.000976553 | ENST00000566949 | gencode      | TAGTGTGTTTCTTACCACCTTTGGCTTTGAGCACTCAAAGTGCAGA  |
| RP11-603J24.7 | -2.0246615 | 0.000871451 | 0.025394391 | ENST00000552016 | gencode      | GTA CTGACCTGAAAACCTGTGACATAAAGAACACCAACAAGTGCTC |
| RP11-293M10.6 | -1.9464185 | 0.000252757 | 0.010183432 | ENST00000560419 | gencode      | GGCTTCTCTTCCAATGACCACCAATGAGAATGTTATAAAAATATGTC |
| LINC01133     | -1.9330405 | 5.52E-05    | 0.002727191 | NR_038849       | RefSeq       | GCTTTGTATGTTATTAATGTGTCTCGTCAATGCTGTTGGCATTGT   |
| XLOC_012542   | -1.9200927 | 1.86E-06    | 0.00021877  | TCONS_00025724  | Cabili et al | GCGGGAGCTGGTGCCTGGCAGGAGGGACTGGCTTATGCCACCCTG   |
| RP11-315D16.3 | -1.8115402 | 0.001743703 | 0.041712656 | ENST00000566875 | gencode      | ATGAAGGACAAACCACAGAGAAGATCCACGAGGTTTTCTGCTAAAC  |
| CASP1P1       | -1.8063674 | 0.000541629 | 0.017275697 | ENST00000526345 | gencode      | TGAAAGGATGACTTTGACAATACGCTTCTACCTTCCCAGAACAT    |
| RPL23AP7      | -1.7817485 | 1.06E-05    | 0.000773313 | NR_024530       | RefSeq       | TTCCACACTACAGAAAAGATCCAGTCTTCTTAGAGAACCCAGTGA   |
| RP11-403F21.1 | -1.6433331 | 0.000423804 | 0.015089406 | ENST00000443069 | gencode      | TTCTACATAAACCGAGTCAGCCACCAGATTCAGACCTTTGTGACAA  |
| RP11-211G3.2  | -1.6278029 | 4.41E-05    | 0.002330142 | ENST00000450760 | gencode      | CACATAGAAAACCTGGAGCCAAAGCATTGGCAAGAGCGGAAAAAA   |
| LINC00853     | -1.6215043 | 1.76E-07    | 0.000026917 | NR_047498       | RefSeq       | GGATCCTGAAGCACAATAAACAGATAGTATTTCTGCATGTGTCAA   |
| AC096582.8    | -1.621083  | 1.05E-05    | 0.000773313 | ENST00000413839 | gencode      | TCTGAGCCAGCTGCACGACAAGTTCGAGCATCTAAAATGATTCAA   |
| RPL23AP7      | -1.6020753 | 4.34E-05    | 0.002330142 | NR_024531       | RefSeq       | AGACATTTAGGAGAAGAATCCAGTCTTCTTAGAGAACCCAGTGAC   |
| ARF4P2        | -1.5143237 | 0.001450419 | 0.03640315  | ENST00000430209 | gencode      | TCTTCAGTCTTCTTCTAACAGGACATGGTATGTTCAAGCCACTTGT  |

**Table S2.** Demographic and clinical characteristics of the pediatric B-ALL patients of the TARGET dataset. Abbreviations: Abbreviations: CNS: central nervous system; CNS 1 means no CNS involvement, CNS 2 is a very low level, and CNS 3 is definite CNS involvement. F: female; M: male; NA: not available; MLL: MLL gene; OS: Overall Survival; t(12;21): translocation(12;21); t(1;19): translocation(1;19); t(9;22): translocation(9;22); (+): Positive; (-): Negative.

| Sample           | Sex | Age at Diagnosis (years) | Phenotype   | CNS | t(12;21): ETV6-RUNX1 Fusion | t(1;19): TCF3-PBX1 Fusion | t(9;22): BCR-ABL1 Fusion | MLL Rearrangements - Status | Trisomy 4 and 10 - Status | Nº Chromosomes | Vital Status | OS Time (years) |
|------------------|-----|--------------------------|-------------|-----|-----------------------------|---------------------------|--------------------------|-----------------------------|---------------------------|----------------|--------------|-----------------|
| TARGET-10-PAMDRM | M   | 7.87                     | B Cell ALL  | 2   | (-)                         | (-)                       | (-)                      | (-)                         | (-)                       | 46             | Dead         | 3.32            |
| TARGET-10-PAMXHJ | M   | 6.08                     | B-Precursor | 2   | (-)                         | (-)                       | (-)                      | (-)                         | (+)                       | 60             | Alive        | 11.20           |
| TARGET-10-PAMXSP | M   | 3.35                     | B-Precursor | 3   | (-)                         | (-)                       | (-)                      | (-)                         | (-)                       | 54             | Alive        | 12.00           |
| TARGET-10-PANATY | F   | 4.22                     | B-Precursor | 1   | NA                          | (-)                       | (-)                      | (-)                         | (-)                       | 45             | Alive        | 11.16           |
| TARGET-10-PANDBX | F   | 3.83                     | B-Precursor | 1   | (-)                         | (-)                       | (-)                      | (-)                         | (-)                       | 46             | Dead         | 4.71            |
| TARGET-10-PANEUH | M   | 1.77                     | B-Precursor | 1   | NA                          | (-)                       | (-)                      | (-)                         | (+)                       | 55             | Alive        | 11.31           |
| TARGET-10-PANJPG | F   | 13.17                    | B-Precursor | 1   | NA                          | (-)                       | (-)                      | (-)                         | (-)                       | 46             | Alive        | 11.15           |
| TARGET-10-PANJWJ | M   | 11.00                    | B-Precursor | 3   | NA                          | (-)                       | (+)                      | (-)                         | (-)                       | 46             | Alive        | 10.09           |
| TARGET-10-PANKAK | M   | 6.41                     | B-Precursor | 2   | (-)                         | (-)                       | (-)                      | (-)                         | (+)                       | 67             | Dead         | 3.00            |
| TARGET-10-PANKGK | M   | 12.74                    | B-Precursor | 1   | NA                          | (-)                       | (-)                      | (-)                         | (-)                       | 46             | Alive        | 5.57            |
| TARGET-10-PANKMB | F   | 8.21                     | B-Precursor | 2   | NA                          | (-)                       | (-)                      | (-)                         | (-)                       | 47             | Alive        | 11.43           |
| TARGET-10-PANLIC | F   | 14.84                    | B-Precursor | 2   | (-)                         | (-)                       | (-)                      | (-)                         | (-)                       | 47             | Alive        | 10.99           |
| TARGET-10-PANNGL | F   | 12.85                    | B-Precursor | 1   | (-)                         | (-)                       | (-)                      | (-)                         | (-)                       | 47             | Alive        | 6.88            |
| TARGET-10-PANRWG | M   | 2.68                     | B-Precursor | 1   | (-)                         | (-)                       | (-)                      | (-)                         | (-)                       | 47             | Alive        | 10.32           |
| TARGET-10-PANRYM | F   | 2.33                     | B-Precursor | 1   | NA                          | (-)                       | (-)                      | (-)                         | (+)                       | 55             | Alive        | 4.59            |
| TARGET-10-PANSDA | F   | 12.64                    | B-Precursor | 1   | NA                          | (-)                       | (-)                      | (-)                         | (-)                       | 46             | Dead         | 3.12            |
| TARGET-10-PANSFD | M   | 5.44                     | B Cell ALL  | 2   | (-)                         | (-)                       | (-)                      | (-)                         | (-)                       | 46             | Dead         | 1.54            |
| TARGET-10-PANSHK | M   | 2.29                     | B Cell ALL  | 1   | (-)                         | (-)                       | (-)                      | (-)                         | (-)                       | 46             | Dead         | 6.70            |
| TARGET-10-PANSIA | F   | 5.59                     | B-Precursor | 1   | NA                          | (-)                       | (-)                      | (-)                         | (+)                       | 64             | Alive        | 10.76           |
| TARGET-10-PANSPW | M   | 13.14                    | B-Precursor | 1   | NA                          | (-)                       | (+)                      | (-)                         | (-)                       | 46             | Dead         | 2.38            |
| TARGET-10-PANSUL | M   | 2.43                     | B-Precursor | 1   | NA                          | (-)                       | (-)                      | (-)                         | (-)                       | 46             | Dead         | 2.92            |
| TARGET-10-PANSXG | F   | 7.60                     | B-Precursor | 2   | (-)                         | (-)                       | (-)                      | (-)                         | (-)                       | 53             | Alive        | 10.49           |

|                  |   |       |             |   |     |     |     |     |     |    |       |       |
|------------------|---|-------|-------------|---|-----|-----|-----|-----|-----|----|-------|-------|
| TARGET-10-PANTSM | M | 7.09  | B-Precursor | 1 | (-) | (-) | (-) | (-) | (-) | 45 | Dead  | 3.32  |
| TARGET-10-PANTTZ | F | 2.60  | B-Precursor | 1 | (-) | NA  | (-) | (-) | (-) | 48 | Alive | 9.97  |
| TARGET-10-PANUHA | M | 3.56  | B-Precursor | 1 | (+) | (-) | (-) | (-) | (-) | 46 | Alive | 11.00 |
| TARGET-10-PANUUF | F | 11.03 | B-Precursor | 1 | NA  | (-) | (-) | (-) | (-) | 46 | Alive | 10.71 |
| TARGET-10-PANWEZ | F | 14.34 | B-Precursor | 1 | (+) | (-) | (-) | (-) | (-) | 46 | Alive | 8.61  |
| TARGET-10-PANWHJ | M | 3.10  | B-Precursor | 1 | (-) | (-) | (-) | (-) | (-) | 53 | Alive | 10.32 |
| TARGET-10-PANWHW | F | 4.02  | B-Precursor | 2 | (-) | (-) | (-) | (-) | (-) | 46 | Alive | 5.25  |
| TARGET-10-PANWVW | M | 2.95  | B-Precursor | 1 | NA  | (-) | (+) | (-) | (-) | 47 | Alive | 9.77  |
| TARGET-10-PANWYH | M | 4.89  | B Cell ALL  | 1 | (-) | (-) | (-) | (-) | (-) | 46 | Dead  | 3.88  |
| TARGET-10-PANXDR | M | 3.26  | B-Precursor | 1 | NA  | (-) | (-) | (-) | (-) | 57 | Alive | 10.41 |
| TARGET-10-PANYEJ | M | 1.86  | B-Precursor | 1 | NA  | NA  | (-) | NA  | NA  | NA | Alive | 10.61 |
| TARGET-10-PANYGB | F | 7.63  | B Cell ALL  | 1 | (-) | (-) | (-) | (-) | (-) | 46 | Dead  | 5.78  |
| TARGET-10-PANYZE | F | 4.05  | B Cell ALL  | 1 | (-) | (-) | (-) | (-) | (-) | 50 | Dead  | 8.39  |
| TARGET-10-PANZPJ | M | 13.02 | B-Precursor | 1 | NA  | NA  | (-) | NA  | NA  | NA | Dead  | 2.61  |
| TARGET-10-PAPAGK | F | 2.34  | B-Precursor | 1 | (-) | NA  | (-) | NA  | NA  | NA | Alive | 9.66  |
| TARGET-10-PAPAIZ | F | 6.45  | B-Precursor | 1 | (-) | (-) | (-) | (-) | (-) | 52 | Alive | 9.94  |
| TARGET-10-PAPAXK | M | 9.56  | B-Precursor | 1 | (-) | NA  | (-) | (-) | (-) | 44 | Alive | 10.38 |
| TARGET-10-PAPBCI | M | 9.92  | B-Precursor | 2 | NA  | (-) | (-) | (-) | (-) | 46 | Dead  | 8.45  |
| TARGET-10-PAPBFN | M | 10.89 | B-Precursor | 1 | NA  | (-) | (-) | (-) | (+) | 52 | Dead  | 4.13  |
| TARGET-10-PAPBSY | M | 2.42  | B-Precursor | 1 | (-) | (+) | (-) | (-) | (-) | 46 | Dead  | 1.82  |
| TARGET-10-PAPCUR | F | 3.01  | B-Precursor | 1 | (-) | (-) | (-) | (-) | (-) | 46 | Dead  | 1.01  |
| TARGET-10-PAPDKJ | M | 3.97  | B-Precursor | 1 | (+) | (-) | (-) | (-) | (-) | 46 | Dead  | 3.99  |
| TARGET-10-PAPDUF | M | 3.33  | B-Precursor | 1 | (-) | (-) | (-) | (-) | (+) | 56 | Alive | 10.05 |
| TARGET-10-PAPDUV | F | 5.44  | B Cell ALL  | 1 | (-) | (-) | (-) | (-) | (-) | 46 | Alive | 9.59  |
| TARGET-10-PAPECF | F | 2.15  | B-Precursor | 1 | (+) | (-) | (-) | (-) | (-) | 48 | Alive | 3.53  |
| TARGET-10-PAPEFH | F | 6.96  | B-Precursor | 1 | (-) | (-) | (-) | (-) | (-) | 48 | Dead  | 2.33  |
| TARGET-10-PAPEJN | M | 3.09  | B Cell ALL  | 1 | (+) | NA  | (-) | NA  | NA  | NA | Dead  | 2.56  |

|                  |   |       |             |   |     |     |     |     |     |    |       |      |
|------------------|---|-------|-------------|---|-----|-----|-----|-----|-----|----|-------|------|
| TARGET-10-PAPESW | F | 2.89  | B-Precursor | 1 | (-) | (-) | (-) | (-) | (-) | 57 | Alive | 9.70 |
| TARGET-10-PAPEWB | F | 7.13  | B-Precursor | 2 | (-) | (-) | (-) | (-) | (-) | 46 | Alive | 9.39 |
| TARGET-10-PAPFXN | F | 1.84  | B-Precursor | 3 | (-) | (-) | (-) | (-) | (-) | 55 | Alive | 3.18 |
| TARGET-10-PAPGFP | F | 9.63  | B-Precursor | 1 | (-) | (-) | (-) | (-) | (-) | 46 | Dead  | 2.59 |
| TARGET-10-PAPGYC | F | 3.66  | B-Precursor | 1 | (-) | (-) | (-) | (-) | (-) | 48 | Dead  | 5.48 |
| TARGET-10-PAPHGD | M | 1.78  | B-Precursor | 1 | (-) | (-) | (-) | (-) | (-) | 45 | Alive | 9.80 |
| TARGET-10-PAPHJF | F | 6.87  | B-Precursor | 1 | (-) | (+) | (-) | (-) | (-) | 46 | Dead  | 1.32 |
| TARGET-10-PAPHYN | M | 5.69  | B-Precursor | 2 | (-) | (-) | (-) | (-) | (-) | 46 | Alive | 8.25 |
| TARGET-10-PAPHZT | F | 1.51  | B-Precursor | 1 | NA  | (-) | (-) | (-) | (-) | 46 | Alive | 9.29 |
| TARGET-10-PAPIGX | F | 14.32 | B-Precursor | 1 | (-) | NA  | (-) | NA  | NA  | NA | Alive | 1.76 |
| TARGET-10-PAPIJM | M | 10.89 | B-Precursor | 1 | (-) | NA  | (-) | NA  | (+) | NA | Alive | 3.29 |
| TARGET-10-PAPIRZ | F | 13.39 | B-Precursor | 1 | (-) | NA  | (-) | NA  | NA  | NA | Dead  | 2.76 |
| TARGET-10-PAPJHB | F | 5.49  | B-Precursor | 1 | (-) | (-) | (-) | (-) | (-) | 47 | Alive | 5.12 |
| TARGET-10-PAPJHR | M | 11.00 | B-Precursor | 1 | (-) | NA  | (-) | NA  | NA  | NA | Dead  | 3.25 |
| TARGET-10-PAPJIB | F | 2.47  | B-Precursor | 2 | (-) | (-) | (-) | (-) | (-) | 53 | Dead  | 3.68 |
| TARGET-10-PAPJXI | F | 8.90  | B-Precursor | 1 | (-) | (-) | (-) | (-) | (-) | 45 | Alive | 8.84 |
| TARGET-10-PAPKNJ | F | 4.32  | B-Precursor | 1 | (-) | NA  | (-) | (-) | (-) | 47 | Alive | 9.52 |
| TARGET-10-PAPLTZ | M | 5.56  | B-Precursor | 1 | (+) | (-) | (-) | (-) | (-) | 51 | Dead  | 7.08 |
| TARGET-10-PAPLUG | M | 1.39  | B-Precursor | 2 | (-) | NA  | (-) | NA  | NA  | NA | Dead  | 3.16 |
| TARGET-10-PAPMVB | M | 1.91  | B-Precursor | 1 | (+) | (-) | (-) | (-) | (-) | 47 | Dead  | 3.87 |
| TARGET-10-PAPNMY | M | 13.99 | B-Precursor | 1 | (-) | (-) | (-) | (-) | (-) | 46 | Dead  | 5.39 |
| TARGET-10-PAPRCS | M | 14.09 | B-Precursor | 2 | (-) | (-) | (-) | (-) | (-) | 46 | Dead  | 1.26 |
| TARGET-10-PAPRFE | F | 2.57  | B-Precursor | 1 | (-) | (+) | (-) | (-) | (-) | 46 | Dead  | 1.07 |
| TARGET-10-PAPRMM | M | 3.76  | B-Precursor | 2 | (-) | NA  | (-) | (-) | (-) | 46 | Dead  | 0.32 |
| TARGET-10-PAPSPN | M | 11.43 | B-Precursor | 1 | (-) | (-) | (-) | (-) | (-) | 46 | Dead  | 2.01 |
| TARGET-10-PAPTAT | M | 2.54  | B-Precursor | 1 | (-) | NA  | (-) | (-) | (-) | 46 | Alive | 8.93 |
| TARGET-10-PAPTLM | F | 1.86  | B-Precursor | 2 | (-) | (-) | (-) | (-) | (-) | 46 | Dead  | 2.52 |

|                  |   |       |             |   |     |     |     |     |     |    |       |      |
|------------------|---|-------|-------------|---|-----|-----|-----|-----|-----|----|-------|------|
| TARGET-10-PAPVTA | M | 2.79  | B-Precursor | 1 | (-) | (-) | (-) | (-) | (-) | 51 | Alive | 8.81 |
| TARGET-10-PAPZNK | F | 10.02 | B-Precursor | 1 | (-) | NA  | (-) | (-) | (-) | NA | Dead  | 2.42 |
| TARGET-10-PARACA | M | 2.66  | B-Precursor | 2 | (-) | (+) | (-) | (-) | (-) | 46 | Dead  | 2.21 |
| TARGET-10-PARAKF | F | 8.35  | B-Precursor | 1 | (+) | NA  | (-) | (-) | (-) | NA | Alive | 5.32 |
| TARGET-10-PARAPE | F | 3.22  | B-Precursor | 1 | (-) | NA  | (-) | (-) | (-) | 46 | Alive | 8.19 |
| TARGET-10-PARARJ | F | 3.09  | B-Precursor | 1 | (-) | NA  | (-) | (-) | (-) | NA | Dead  | 1.25 |
| TARGET-10-PARBGL | F | 3.25  | B-Precursor | 1 | (-) | NA  | (-) | (-) | (-) | 47 | Alive | 8.89 |
| TARGET-10-PARBRK | F | 7.22  | B-Precursor | 1 | (-) | NA  | (-) | NA  | (-) | NA | Dead  | 0.27 |
| TARGET-10-PARBVI | F | 13.55 | B-Precursor | 1 | (-) | (-) | (-) | (-) | (-) | 46 | Dead  | 3.21 |
| TARGET-10-PARDWN | F | 1.97  | B-Precursor | 1 | (-) | NA  | (-) | (-) | (-) | 45 | Alive | 8.24 |
| TARGET-10-PARFTR | M | 5.82  | B-Precursor | 1 | (-) | (+) | (-) | (-) | (-) | 46 | Dead  | 1.27 |
| TARGET-10-PARJLA | M | 9.91  | B-Precursor | 2 | (-) | NA  | (-) | (-) | (-) | 45 | Alive | 7.97 |
| TARGET-10-PARJSR | M | 11.21 | B-Precursor | 1 | (-) | (-) | (-) | (-) | (-) | 55 | Dead  | 2.34 |
| TARGET-10-PARJZZ | M | 4.21  | B-Precursor | 1 | (-) | (-) | (-) | (-) | (-) | 47 | Dead  | 2.72 |
| TARGET-10-PARLAF | M | 3.97  | B-Precursor | 1 | (+) | (-) | (-) | (-) | (+) | 89 | Alive | 8.05 |
| TARGET-10-PARPNM | F | 13.53 | B-Precursor | 1 | (-) | (-) | (-) | (-) | (-) | 46 | Dead  | 0.64 |
| TARGET-10-PARSLI | F | 4.52  | B-Precursor | 2 | (-) | NA  | (-) | (-) | (-) | 45 | Alive | 6.93 |
| TARGET-10-PARSZH | F | 12.92 | B-Precursor | 1 | (-) | NA  | (-) | (-) | (-) | NA | Alive | 6.57 |
| TARGET-10-PARTJL | F | 2.90  | B-Precursor | 1 | (-) | NA  | (-) | (-) | (-) | NA | Alive | 2.65 |
| TARGET-10-PARTKL | F | 2.98  | B-Precursor | 1 | (-) | (-) | (-) | (-) | (-) | 51 | Dead  | 2.46 |
| TARGET-10-PARUAT | F | 2.50  | B-Precursor | 1 | (-) | NA  | (-) | (-) | (-) | 45 | Alive | 8.11 |
| TARGET-10-PARUFL | F | 4.59  | B-Precursor | 1 | (-) | NA  | (-) | (-) | (-) | 48 | Alive | 7.83 |
| TARGET-10-PARUGP | M | 2.08  | B-Precursor | 1 | (-) | (+) | (-) | (-) | (-) | NA | Dead  | 0.79 |
| TARGET-10-PARUNW | F | 1.38  | B-Precursor | 2 | (-) | NA  | (-) | (-) | (-) | 45 | Alive | 7.64 |
| TARGET-10-PARWRJ | F | 1.05  | B-Precursor | 2 | (-) | NA  | (-) | (-) | (-) | 45 | Alive | 7.98 |
| TARGET-10-PARXCD | F | 14.37 | B-Precursor | 2 | (-) | NA  | (-) | (-) | (-) | 45 | Alive | 3.63 |
| TARGET-10-PARXMC | F | 6.92  | B-Precursor | 1 | (+) | NA  | (-) | (-) | (-) | NA | Alive | 7.72 |

|                  |   |       |             |   |     |     |     |     |     |    |       |      |
|------------------|---|-------|-------------|---|-----|-----|-----|-----|-----|----|-------|------|
| TARGET-10-PARYAJ | M | 1.16  | B-Precursor | 1 | (-) | NA  | (-) | (-) | (-) | 45 | Dead  | 7.38 |
| TARGET-10-PARZYX | M | 11.40 | B-Precursor | 1 | (-) | NA  | (-) | (-) | (-) | 45 | Alive | 7.57 |
| TARGET-10-PASEVJ | F | 11.19 | B-Precursor | 1 | (-) | NA  | (-) | (-) | (-) | 46 | Dead  | 2.44 |
| TARGET-10-PASHUI | M | 5.11  | B-Precursor | 2 | (-) | NA  | (-) | (-) | (-) | NA | Dead  | 1.66 |
| TARGET-10-PASILP | M | 9.93  | B-Precursor | 2 | (-) | NA  | (-) | (-) | (-) | 46 | Dead  | 2.90 |
| TARGET-10-PASKAY | M | 1.60  | B-Precursor | 1 | (-) | NA  | (-) | (-) | (+) | NA | Dead  | 1.33 |
| TARGET-10-PASMGZ | F | 4.51  | B-Precursor | 1 | (-) | NA  | (-) | (-) | (-) | 49 | Alive | 6.58 |
| TARGET-10-PASNJI | M | 3.75  | B-Precursor | 1 | (-) | NA  | (-) | (-) | (-) | 46 | Alive | 6.09 |
| TARGET-10-PASREU | F | 1.87  | B-Precursor | 1 | (-) | NA  | (-) | (-) | (-) | 47 | Alive | 6.58 |
| TARGET-10-PASTSR | M | 10.44 | B-Precursor | 1 | (-) | NA  | (-) | (-) | (-) | 45 | Alive | 6.80 |
| TARGET-10-PASTYT | M | 3.03  | B-Precursor | 1 | (-) | NA  | (-) | (-) | (-) | 46 | Alive | 6.66 |
| TARGET-10-PASUBW | M | 13.96 | B-Precursor | 1 | (-) | (-) | (-) | (-) | (-) | 48 | Dead  | 1.30 |
| TARGET-10-PASXFY | F | 2.60  | B-Precursor | 1 | (-) | NA  | (-) | (-) | (-) | 45 | Alive | 5.96 |
| TARGET-10-PASXZH | M | 3.24  | B-Precursor | 1 | (-) | NA  | (-) | (-) | (-) | 46 | Alive | 6.15 |
| TARGET-10-PATCJJ | F | 10.34 | B-Precursor | 1 | (-) | NA  | (-) | (-) | (-) | 45 | Alive | 6.29 |
| TARGET-10-PATCTI | M | 6.61  | B-Precursor | 1 | (-) | (+) | (-) | (-) | (-) | 46 | Dead  | 1.32 |
| TARGET-10-PATEVE | M | 7.55  | B-Precursor | 1 | (-) | NA  | (-) | (-) | (-) | 46 | Alive | 5.89 |

**Table S3.** Comparison of clinical characteristics according to AL133346.1 and CCN2 expression in pediatric B-ALL patients from TARGET dataset. Chr: Chromosome; NA: not available.

|            | Pediatric B-ALL TCGA Population (N = 120) |                         |         |                   |                         |                         |         |                   |
|------------|-------------------------------------------|-------------------------|---------|-------------------|-------------------------|-------------------------|---------|-------------------|
|            | AL133346.1 Expression                     |                         | p-value | p-value adj (FDR) | CCN2 Expression         |                         | p-value | p-value adj (FDR) |
|            | Downexpression (N = 60)                   | OverExpression (N = 60) |         |                   | Downexpression (N = 60) | Overexpression (N = 60) |         |                   |
| <b>Sex</b> |                                           |                         |         |                   |                         |                         |         |                   |
| Female     | 30 (50.0%)                                | 31 (51.7%)              | 1       | 1                 | 33 (55.0%)              | 28 (46.7%)              | 0.465   | 0.465             |
| Male       | 30 (50.0%)                                | 29 (48.3%)              |         |                   | 27 (45.0%)              | 32 (53.3%)              |         |                   |



|                                    |            |            |       |       |            |            |        |        |
|------------------------------------|------------|------------|-------|-------|------------|------------|--------|--------|
| <b>Age at Diagnosis (years)</b>    |            |            |       |       |            |            |        |        |
| 1-9.99                             | 47 (78.3%) | 44 (73.3%) | 0.670 | 0.984 | 41 (68.3%) | 50 (83.3%) | 0.087  | 0.174  |
| ≥ 10                               | 13 (21.7%) | 16 (26.7%) |       |       | 19 (31.7%) | 10 (16.7%) |        |        |
| <b>CNS</b>                         |            |            |       |       |            |            |        |        |
| 1                                  | 48 (80.0%) | 45 (75.0%) | 0.738 | 0.984 | 47 (78.3%) | 46 (76.7%) | 0.282  | 0.367  |
| 2                                  | 11 (18.3%) | 13 (21.7%) |       |       | 13 (21.7%) | 11 (18.3%) |        |        |
| 3                                  | 1 (1.7%)   | 2 (3.3%)   |       |       | 0 (0%)     | 3 (5.0%)   |        |        |
| <b>t(12;21): ETV6-RUNX1 Fusion</b> |            |            |       |       |            |            |        |        |
| Negative                           | 54 (98.2%) | 37 (80.4%) | 0.005 | 0.020 | 57 (100%)  | 34 (77.3%) | 0.0001 | 0.0008 |
| Positive                           | 1 (1.8%)   | 9 (19.6%)  |       |       | 0 (0%)     | 10 (22.7%) |        |        |
| <b>t(1;19): TCF3-PBX1 Fusion</b>   |            |            |       |       |            |            |        |        |
| Negative                           | 24 (82.8%) | 43 (95.6%) | 0.103 | 0.275 | 26 (78.8%) | 41 (100%)  | 0.002  | 0.008  |
| Positive                           | 5 (17.2%)  | 2 (4.4%)   |       |       | 7 (21.2%)  | 0 (0%)     |        |        |
| <b>t(9;22): BCR-ABL1 Fusion</b>    |            |            |       |       |            |            |        |        |
| Negative                           | 59 (98.3%) | 58 (96.7%) | 1     | 1     | 60 (100%)  | 57 (95.0%) | 0.244  | 0.367  |
| Positive                           | 1 (1.7%)   | 2 (3.3%)   |       |       | 0 (0%)     | 3 (5.0%)   |        |        |
| <b>MLL Rearrangements - Status</b> |            |            |       |       |            |            |        |        |
| Negative                           | 57 (100%)  | 53 (100%)  | NA    | NA    | 56 (100%)  | 54 (100%)  | NA     | NA     |
| Positive                           | 0 (0%)     | 0 (0%)     |       |       | 0 (0%)     | 0 (0%)     |        |        |
| <b>Trisomy 4 and 10 - Status</b>   |            |            |       |       |            |            |        |        |
| Positive                           | 54 (94.7%) | 48 (87.3%) | 0.199 | 0.398 | 53 (94.6%) | 49 (87.5%) | 0.321  | 0.367  |
| Negative                           | 3 (5.3%)   | 7 (12.7%)  |       |       | 3 (5.4%)   | 7 (12.5%)  |        |        |

| Ploidy                            |            |            |        |       |            |            |      |       |
|-----------------------------------|------------|------------|--------|-------|------------|------------|------|-------|
| Hipodiploidy (< 46 Chr)           | 16 (29.6%) | 1 (2.1%)   | 0.0002 | 0.002 | 12 (24.5%) | 5 (9.6%)   | 0.05 | 0.133 |
| Diploidy (46 Chr)                 | 24 (44.4%) | 21 (44.7%) |        |       | 23 (46.9%) | 22 (42.3%) |      |       |
| Partial Hyperdiploidy (47-50 Chr) | 9 (16.7%)  | 10 (21.3%) |        |       | 9 (18.4%)  | 10 (19.2%) |      |       |
| High Hyperdiploidy (≥ 51)         | 5 (9.3%)   | 15 (31.9%) |        |       | 5 (10.2%)  | 15 (28.9%) |      |       |

**Table S4.** Cox Univariate and multivariate overall analysis of clinical covariates in pediatric B-ALL patients from TARGET dataset. NA: Not included in the multivariate analysis. The “MLL Rearrangements – Status” covariate was excluded from the analysis because it did not have positive samples.

|                                                           | Univariate Cox Analysis |          | Multivariate Cox Analysis |         |
|-----------------------------------------------------------|-------------------------|----------|---------------------------|---------|
|                                                           | Hazard Ratio (95% CI)   | p-value  | Hazard Ratio (95% CI)     | p-value |
| <b>Sex (Male vs Female)</b>                               | 1.852 (1.062-3.228)     | 0.030    | 1.900 (0.908-3.973)       | 0.088   |
| <b>Age at Diagnosis (≥ 10 vs 1-9.9 years)</b>             | 1.500 (0.823-2.733)     | 0.186    | 1.140 (0.510-2.550)       | 0.750   |
| <b>CNS (2-3 vs 1)</b>                                     | 1.024 (0.538-1.949)     | 0.943    | NA                        | NA      |
| <b>t(12;21): ETV6-RUNX1 Fusion (Positive vs Negative)</b> | 0.697 (0.250-1.944)     | 0.490    | NA                        | NA      |
| <b>t(1;19): TCF3-PBX1 Fusion (Positive vs Negative)</b>   | 21.840 (6.968-68.480)   | 1.22E-07 | 7.589 (1.914-30.085)      | 0.003   |
| <b>t(9;22): BCR-ABL1 Fusion (Positive vs Negative)</b>    | 0.667 (0.092-4.834)     | 0.689    | NA                        | NA      |
| <b>Trisomy 4 and 10 - Status (Positive vs Negative)</b>   | 0.343 (0.192-1.986)     | 0.418    | NA                        | NA      |
| <b>Ploidy (Hipodiploidy vs Diploidy)</b>                  | 0.126 (0.030-0.531)     | 0.005    | 0.237 (0.030-1.881)       | 0.173   |
| <b>Ploidy (Partial Hyperdiploidy vs Diploidy)</b>         | 0.383 (0.158-0.926)     | 0.033    | 0.650 (0.252-1.679)       | 0.374   |
| <b>Ploidy (High Hyperdiploidy vs Diploidy)</b>            | 0.346 (0.143-0.838)     | 0.019    | 0.386(0.148-1.006)        | 0.051   |
| <b>CCN2 Expression (High vs Low)</b>                      | 0.566 (0.328-0.980)     | 0.042    | 0.448 (0.204-0.984)       | 0.045   |
| <b>AL133346.1 Expression (High vs Low)</b>                | 1.084 (0.632-1.859)     | 0.770    | NA                        | NA      |

**Table S5.** Demographic and clinical characteristics of the pediatric T-ALL patients of the TARGET dataset. Abbreviations: CNS: central nervous system; CNS 1 means no CNS involvement, CNS 2 is a very low level, and CNS 3 is definite CNS involvement. F: female; M: male; NA: not available; MLL: MLL gene; OS: Overall Survival; t(12;21): translocation(12;21); t(1;19): translocation(1;19); t(9;22): translocation(9;22); (+): Positive; (-): Negative.

| Sample           | Sex | Age at Diagnosis (years) | Phenotype  | CNS | t(12;21): ETV6-RUNX1 Fusion | t(1;19): TCF3-PBX1 Fusion | t(9;22): BCR-ABL1 Fusion | MLL Rearrangements - Status | Trisomy 4 and 10 - Status | Nº Chromosomes | Vital Status | OS Time (years) |
|------------------|-----|--------------------------|------------|-----|-----------------------------|---------------------------|--------------------------|-----------------------------|---------------------------|----------------|--------------|-----------------|
| TARGET-10-PARASZ | F   | 4.41                     | T Cell ALL | 2   | (+)                         | (+)                       | (+)                      | (+)                         | (+)                       | 46             | Alive        | 8.45            |
| TARGET-10-PAREGZ | F   | 8.56                     | T Cell ALL | 1   | NA                          | (+)                       | (+)                      | (+)                         | (+)                       | 46             | Alive        | 8.45            |
| TARGET-10-PARFIH | M   | 5.27                     | T Cell ALL | 1   | NA                          | (+)                       | (+)                      | (+)                         | (+)                       | 46             | Alive        | 3.01            |
| TARGET-10-PARFPJ | M   | 3.69                     | T Cell ALL | 2   | NA                          | NA                        | (+)                      | NA                          | NA                        | 46             | Alive        | 8.07            |
| TARGET-10-PARFXJ | M   | 11.62                    | T Cell ALL | 1   | (+)                         | (+)                       | (+)                      | (+)                         | (+)                       | 46             | Alive        | 8.18            |
| TARGET-10-PARGFL | M   | 4.10                     | T Cell ALL | 3   | NA                          | (+)                       | (+)                      | (+)                         | (+)                       | 52             | Dead         | 5.18            |
| TARGET-10-PARHBI | M   | 7.89                     | T Cell ALL | 1   | (+)                         | NA                        | (+)                      | (+)                         | (+)                       | 46             | Alive        | 8.24            |
| TARGET-10-PARHES | M   | 4.65                     | T Cell ALL | 1   | NA                          | NA                        | (+)                      | (+)                         | NA                        | NA             | Alive        | 8.05            |
| TARGET-10-PARIYD | M   | 8.97                     | T Cell ALL | 1   | NA                          | NA                        | (+)                      | (+)                         | NA                        | 46             | Alive        | 8.51            |
| TARGET-10-PARIZN | M   | 10.20                    | T Cell ALL | 3   | NA                          | NA                        | (+)                      | (+)                         | NA                        | 46             | Dead         | 1.84            |
| TARGET-10-PARJNX | F   | 3.10                     | T Cell ALL | 2   | (+)                         | (+)                       | (+)                      | (+)                         | (+)                       | 46             | Alive        | 8.23            |
| TARGET-10-PARJPL | M   | 3.76                     | T Cell ALL | 1   | NA                          | (+)                       | (+)                      | (+)                         | (+)                       | 46             | Alive        | 8.65            |
| TARGET-10-PARJXW | M   | 14.82                    | T Cell ALL | 1   | NA                          | (+)                       | (+)                      | (+)                         | (+)                       | 46             | Alive        | 0.10            |
| TARGET-10-PARKLK | M   | 1.81                     | T Cell ALL | 1   | (+)                         | NA                        | (+)                      | (+)                         | (+)                       | 46             | Alive        | 0.08            |
| TARGET-10-PARLJA | M   | 8.63                     | T Cell ALL | 2   | (+)                         | (+)                       | (+)                      | (+)                         | (+)                       | 46             | Alive        | 8.03            |
| TARGET-10-PARLST | M   | 9.44                     | T Cell ALL | 2   | (+)                         | NA                        | (+)                      | (+)                         | (+)                       | NA             | Alive        | 8.37            |
| TARGET-10-PARMFF | M   | 8.32                     | T Cell ALL | 1   | (+)                         | (+)                       | (+)                      | (+)                         | (+)                       | 44             | Alive        | 8.73            |
| TARGET-10-PARMIH | M   | 12.42                    | T Cell ALL | 1   | NA                          | (+)                       | (+)                      | (+)                         | (+)                       | 46             | Dead         | 8.08            |
| TARGET-10-PARMKK | M   | 3.35                     | T Cell ALL | 2   | NA                          | (+)                       | (+)                      | (+)                         | (+)                       | 46             | Alive        | 8.22            |

|                  |   |       |            |    |     |     |     |     |     |    |       |      |
|------------------|---|-------|------------|----|-----|-----|-----|-----|-----|----|-------|------|
| TARGET-10-PARMMV | M | 6.36  | T Cell ALL | 1  | NA  | NA  | (+) | (+) | NA  | 46 | Alive | 8.36 |
| TARGET-10-PARMRF | M | 5.98  | T Cell ALL | NA | NA  | NA  | (+) | NA  | NA  | 46 | Alive | 8.18 |
| TARGET-10-PARNBN | M | 10.06 | T Cell ALL | 1  | NA  | (+) | (+) | (+) | (+) | 46 | Alive | 4.62 |
| TARGET-10-PARNEH | M | 4.01  | T Cell ALL | 1  | (+) | (+) | (+) | (+) | (+) | 46 | Dead  | 1.43 |
| TARGET-10-PARNMV | M | 9.53  | T Cell ALL | 1  | NA  | (+) | (+) | (+) | (+) | 46 | Alive | 7.95 |
| TARGET-10-PARNSP | M | 6.04  | T Cell ALL | 1  | (+) | (+) | (+) | (+) | (+) | 47 | Alive | 8.45 |
| TARGET-10-PARNXJ | M | 4.82  | T Cell ALL | 1  | NA  | (+) | (+) | (+) | (+) | 46 | Alive | 7.78 |
| TARGET-10-PARPET | F | 4.96  | T Cell ALL | 1  | (+) | NA  | (+) | (+) | (+) | 46 | Alive | 5.31 |
| TARGET-10-PARPHB | M | 1.10  | T Cell ALL | 3  | NA  | (+) | (+) | (+) | (+) | 46 | Alive | 8.10 |
| TARGET-10-PARPUL | M | 2.25  | T Cell ALL | 1  | (+) | (+) | (+) | (+) | (+) | 46 | Alive | 7.73 |
| TARGET-10-PARPYJ | F | 7.44  | T Cell ALL | 2  | NA  | (+) | (+) | (+) | (+) | 46 | Alive | 7.55 |
| TARGET-10-PARRKK | M | 8.88  | T Cell ALL | 1  | (+) | (+) | (+) | (+) | (+) | 46 | Alive | 7.53 |
| TARGET-10-PARSE  | M | 10.91 | T Cell ALL | 1  | NA  | NA  | (+) | NA  | NA  | NA | Alive | 0.97 |
| TARGET-10-PARSJG | M | 11.97 | T Cell ALL | 1  | NA  | (+) | (+) | (+) | (+) | 46 | Alive | 7.49 |
| TARGET-10-PARSNX | M | 13.46 | T Cell ALL | 2  | NA  | (+) | (+) | (+) | (+) | 46 | Alive | 5.69 |
| TARGET-10-PARTBP | M | 5.63  | T Cell ALL | 1  | NA  | (+) | (+) | (+) | (+) | 46 | Alive | 8.44 |
| TARGET-10-PARTLY | M | 12.30 | T Cell ALL | 1  | NA  | (+) | (+) | (+) | (+) | 49 | Alive | 8.37 |
| TARGET-10-PARUEU | M | 5.57  | T Cell ALL | 1  | (+) | (+) | (+) | (+) | (+) | 46 | Alive | 6.15 |
| TARGET-10-PARUKW | F | 9.79  | T Cell ALL | 1  | (+) | (+) | (+) | (+) | (+) | 46 | Alive | 7.39 |
| TARGET-10-PARVEI | F | 3.43  | T Cell ALL | 1  | (+) | (+) | (+) | (+) | (+) | 46 | Alive | 7.58 |
| TARGET-10-PARVMR | M | 4.96  | T Cell ALL | 1  | NA  | (+) | (+) | (+) | (+) | 46 | Alive | 7.78 |

|                  |   |       |            |   |     |     |     |     |     |    |       |      |
|------------------|---|-------|------------|---|-----|-----|-----|-----|-----|----|-------|------|
| TARGET-10-PARWLP | M | 7.90  | T Cell ALL | 2 | NA  | NA  | (+) | (+) | NA  | NA | Alive | 7.90 |
| TARGET-10-PARWMF | M | 11.70 | T Cell ALL | 1 | (+) | (+) | (+) | (+) | (+) | 46 | Alive | 7.30 |
| TARGET-10-PARWNW | M | 11.95 | T Cell ALL | 1 | NA  | (+) | (+) | (+) | (+) | 46 | Alive | 6.36 |
| TARGET-10-PARXLS | M | 4.38  | T Cell ALL | 1 | (+) | (+) | (+) | (+) | (+) | 46 | Alive | 7.55 |
| TARGET-10-PARXVS | M | 11.75 | T Cell ALL | 1 | NA  | (+) | (+) | (+) | (+) | 46 | Dead  | 6.27 |
| TARGET-10-PASFHR | M | 14.57 | T Cell ALL | 1 | NA  | NA  | (+) | NA  | NA  | 46 | Alive | 7.21 |
| TARGET-10-PASFKA | M | 12.77 | T Cell ALL | 1 | (+) | NA  | (+) | (+) | (+) | 46 | Alive | 7.14 |
| TARGET-10-PASFLK | M | 12.02 | T Cell ALL | 1 | (+) | NA  | (+) | (+) | (+) | NA | Alive | 7.32 |
| TARGET-10-PASHDV | M | 11.66 | T Cell ALL | 2 | NA  | (+) | (+) | (+) | (+) | 46 | Alive | 7.31 |
| TARGET-10-PASHNK | M | 6.61  | T Cell ALL | 1 | (+) | NA  | (+) | (+) | (+) | 46 | Alive | 7.06 |
| TARGET-10-PASHUP | M | 9.68  | T Cell ALL | 2 | (+) | (+) | (+) | (+) | (+) | 46 | Alive | 6.69 |
| TARGET-10-PASHXL | F | 13.53 | T Cell ALL | 1 | NA  | NA  | (+) | NA  | NA  | NA | Alive | 6.82 |
| TARGET-10-PASIIY | M | 5.94  | T Cell ALL | 1 | NA  | NA  | (+) | NA  | NA  | 46 | Alive | 3.75 |
| TARGET-10-PASILW | F | 12.42 | T Cell ALL | 2 | (+) | (+) | (+) | (+) | (+) | 46 | Dead  | 4.56 |
| TARGET-10-PASINX | M | 11.36 | T Cell ALL | 1 | NA  | (+) | (+) | (+) | (+) | 46 | Alive | 6.89 |
| TARGET-10-PASJJR | M | 14.28 | T Cell ALL | 1 | (+) | (+) | (+) | (+) | (+) | 46 | Alive | 6.85 |
| TARGET-10-PASJLN | M | 10.93 | T Cell ALL | 1 | NA  | (+) | (+) | (+) | (+) | 46 | Alive | 7.29 |
| TARGET-10-PASJMK | F | 6.30  | T Cell ALL | 2 | NA  | NA  | (+) | NA  | NA  | 46 | Alive | 7.24 |
| TARGET-10-PASJYI | M | 14.31 | T Cell ALL | 1 | (+) | NA  | (+) | (+) | (+) | 46 | Alive | 6.68 |
| TARGET-10-PASKAD | F | 10.43 | T Cell ALL | 3 | NA  | (+) | (+) | (+) | (+) | 46 | Alive | 6.94 |
| TARGET-10-PASKCL | M | 12.68 | T Cell ALL | 2 | (+) | NA  | (+) | (+) | (+) | NA | Alive | 6.95 |
| TARGET-10-PASKIC | M | 11.20 | T Cell ALL | 1 | (+) | NA  | (+) | (+) | (+) | NA | Alive | 7.42 |
| TARGET-10-PASKSY | M | 9.72  | T Cell ALL | 1 | NA  | (+) | (+) | (+) | (+) | 46 | Alive | 6.48 |

|                  |   |       |            |   |     |     |     |     |     |    |       |      |
|------------------|---|-------|------------|---|-----|-----|-----|-----|-----|----|-------|------|
| TARGET-10-PASKTG | M | 5.83  | T Cell ALL | 1 | NA  | NA  | (+) | NA  | NA  | NA | Alive | 5.83 |
| TARGET-10-PASKXN | M | 9.42  | T Cell ALL | 1 | (+) | (+) | (+) | (+) | (+) | 46 | Alive | 1.59 |
| TARGET-10-PASLAB | F | 4.81  | T Cell ALL | 1 | NA  | (+) | (+) | (+) | (+) | 46 | Alive | 6.89 |
| TARGET-10-PASLBB | M | 7.87  | T Cell ALL | 1 | (+) | NA  | (+) | (+) | (+) | NA | Alive | 6.78 |
| TARGET-10-PASMHF | F | 12.07 | T Cell ALL | 3 | (+) | (+) | (+) | (+) | (+) | 46 | Alive | 6.93 |
| TARGET-10-PASMIC | F | 13.46 | T Cell ALL | 2 | NA  | (+) | (+) | (+) | (+) | 46 | Alive | 6.84 |
| TARGET-10-PASMNV | M | 12.76 | T Cell ALL | 1 | NA  | NA  | (+) | NA  | NA  | 46 | Alive | 6.83 |
| TARGET-10-PASNEH | M | 5.93  | T Cell ALL | 1 | NA  | (+) | (+) | (+) | (+) | 45 | Alive | 7.06 |
| TARGET-10-PASNTZ | M | 7.19  | T Cell ALL | 1 | NA  | NA  | (+) | NA  | NA  | 46 | Alive | 6.81 |
| TARGET-10-PASPDS | M | 10.92 | T Cell ALL | 2 | NA  | NA  | (+) | NA  | NA  | 46 | Alive | 7.19 |
| TARGET-10-PASPPN | M | 12.57 | T Cell ALL | 2 | (+) | (+) | (+) | (+) | (+) | 46 | Dead  | 0.69 |
| TARGET-10-PASRCV | F | 3.40  | T Cell ALL | 1 | NA  | NA  | (+) | (+) | NA  | 46 | Alive | 6.71 |
| TARGET-10-PASRMM | M | 4.37  | T Cell ALL | 1 | NA  | (+) | (+) | (+) | (+) | 46 | Alive | 6.80 |
| TARGET-10-PASSEF | F | 4.94  | T Cell ALL | 2 | NA  | (+) | (+) | (+) | (+) | 46 | Alive | 6.81 |
| TARGET-10-PASSPP | M | 9.97  | T Cell ALL | 2 | NA  | (+) | (+) | (+) | (+) | 46 | Alive | 6.53 |
| TARGET-10-PASSRP | M | 4.50  | T Cell ALL | 1 | NA  | NA  | (+) | (+) | NA  | NA | Alive | 3.37 |
| TARGET-10-PASSSR | M | 7.88  | T Cell ALL | 1 | NA  | NA  | (+) | NA  | NA  | 46 | Alive | 6.74 |
| TARGET-10-PASSZA | M | 14.83 | T Cell ALL | 1 | (+) | (+) | (+) | (+) | (+) | 46 | Alive | 6.83 |
| TARGET-10-PASTDU | M | 8.86  | T Cell ALL | 1 | (+) | NA  | (+) | (+) | (+) | NA | Alive | 6.86 |
| TARGET-10-PASTHE | F | 6.37  | T Cell ALL | 1 | NA  | (+) | (+) | (+) | (+) | 47 | Alive | 6.96 |
| TARGET-10-PASTLP | M | 9.36  | T Cell ALL | 1 | NA  | (+) | (+) | (+) | (+) | 46 | Alive | 6.13 |
| TARGET-10-PASTPT | F | 4.86  | T Cell ALL | 1 | (+) | (+) | (+) | (+) | (+) | 49 | Alive | 6.82 |
| TARGET-10-PASTXU | F | 12.90 | T Cell ALL | 2 | NA  | NA  | (+) | NA  | NA  | 46 | Alive | 5.48 |

|                  |   |       |            |   |     |     |     |     |     |    |       |      |
|------------------|---|-------|------------|---|-----|-----|-----|-----|-----|----|-------|------|
| TARGET-10-PASUGC | M | 9.62  | T Cell ALL | 2 | NA  | (+) | (+) | (+) | (+) | 46 | Alive | 6.60 |
| TARGET-10-PASUIN | M | 13.70 | T Cell ALL | 2 | NA  | (+) | (+) | (+) | (+) | 46 | Alive | 7.02 |
| TARGET-10-PASUSV | M | 8.56  | T Cell ALL | 1 | NA  | (+) | (+) | (+) | (+) | 46 | Alive | 6.99 |
| TARGET-10-PASVIN | M | 7.17  | T Cell ALL | 1 | NA  | (+) | (+) | (+) | (+) | 46 | Alive | 6.65 |
| TARGET-10-PASVPZ | M | 3.65  | T Cell ALL | 1 | (+) | NA  | (+) | (+) | (+) | NA | Alive | 6.66 |
| TARGET-10-PASWFN | M | 11.32 | T Cell ALL | 1 | (+) | NA  | (+) | (+) | (+) | 46 | Alive | 6.56 |
| TARGET-10-PASWSR | F | 3.42  | T Cell ALL | 1 | NA  | (+) | (+) | (+) | (+) | 46 | Alive | 6.34 |
| TARGET-10-PASWXB | M | 9.65  | T Cell ALL | 3 | NA  | NA  | (+) | NA  | NA  | 46 | Alive | 6.26 |
| TARGET-10-PASWXZ | F | 7.55  | T Cell ALL | 1 | (+) | (+) | (+) | (+) | (+) | 46 | Alive | 6.68 |
| TARGET-10-PASWZJ | M | 5.22  | T Cell ALL | 2 | NA  | NA  | (+) | NA  | NA  | 46 | Alive | 6.58 |
| TARGET-10-PASXIL | M | 8.82  | T Cell ALL | 3 | NA  | (+) | (+) | (+) | (+) | 46 | Alive | 6.83 |
| TARGET-10-PASXLT | M | 4.08  | T Cell ALL | 1 | NA  | (+) | (+) | (+) | (+) | 46 | Alive | 6.62 |
| TARGET-10-PASXLZ | M | 5.23  | T Cell ALL | 1 | NA  | NA  | (+) | NA  | NA  | 46 | Alive | 6.33 |
| TARGET-10-PASXMF | M | 10.44 | T Cell ALL | 2 | NA  | NA  | (+) | NA  | NA  | NA | Alive | 6.46 |
| TARGET-10-PASXSI | M | 8.96  | T Cell ALL | 3 | NA  | (+) | (+) | (+) | (+) | 46 | Alive | 6.63 |
| TARGET-10-PASXUC | F | 6.82  | T Cell ALL | 1 | NA  | (+) | (+) | (+) | (+) | 89 | Alive | 6.13 |
| TARGET-10-PASXUU | M | 7.01  | T Cell ALL | 1 | NA  | (+) | (+) | (+) | (+) | 46 | Alive | 6.31 |
| TARGET-10-PASYAJ | M | 3.05  | T Cell ALL | 1 | NA  | (+) | (+) | (+) | (+) | 46 | Alive | 6.64 |
| TARGET-10-PASYCN | M | 10.98 | T Cell ALL | 2 | (+) | (+) | (+) | (+) | (+) | 50 | Alive | 6.33 |
| TARGET-10-PASYIS | F | 8.04  | T Cell ALL | 2 | (+) | (+) | (+) | (+) | (+) | 45 | Alive | 6.26 |
| TARGET-10-PASYSJ | M | 14.73 | T Cell ALL | 3 | (+) | (+) | (+) | (+) | (+) | 46 | Alive | 5.82 |
| TARGET-10-PASZEW | F | 7.34  | T Cell ALL | 1 | NA  | (+) | (+) | (+) | (+) | 46 | Alive | 6.34 |
| TARGET-10-PASZiy | M | 14.33 | T Cell ALL | 1 | (+) | (+) | (+) | (+) | (+) | 50 | Alive | 6.49 |
| TARGET-10-PATALJ | M | 12.78 | T Cell ALL | 1 | NA  | (+) | (+) | (+) | (+) | 46 | Alive | 5.21 |
| TARGET-10-PATAXS | M | 1.00  | T Cell ALL | 1 | (+) | NA  | (+) | (+) | (+) | NA | Alive | 6.17 |

|                  |   |       |            |   |     |     |     |     |     |    |       |      |
|------------------|---|-------|------------|---|-----|-----|-----|-----|-----|----|-------|------|
| TARGET-10-PATAYT | F | 5.91  | T Cell ALL | 2 | NA  | (+) | (+) | (+) | (+) | 46 | Alive | 6.49 |
| TARGET-10-PATBDK | M | 7.94  | T Cell ALL | 2 | NA  | NA  | (+) | NA  | NA  | 46 | Alive | 6.33 |
| TARGET-10-PATBGC | F | 10.80 | T Cell ALL | 1 | NA  | (+) | (+) | (+) | (+) | 46 | Alive | 5.04 |
| TARGET-10-PATBNT | M | 13.52 | T Cell ALL | 2 | (+) | (+) | (+) | (+) | (+) | 46 | Alive | 5.90 |
| TARGET-10-PATBRV | F | 8.36  | T Cell ALL | 1 | NA  | (+) | (+) | (+) | (+) | 46 | Dead  | 0.58 |
| TARGET-10-PATBTX | M | 3.15  | T Cell ALL | 1 | (+) | NA  | (+) | (+) | (+) | 46 | Alive | 5.98 |
| TARGET-10-PATCDM | M | 3.26  | T Cell ALL | 3 | (+) | (+) | (+) | (+) | (+) | 46 | Dead  | 2.60 |
| TARGET-10-PATCKV | M | 14.42 | T Cell ALL | 1 | NA  | (+) | (+) | (+) | (+) | 50 | Alive | 6.59 |
| TARGET-10-PATCNI | F | 4.61  | T Cell ALL | 1 | (+) | (+) | (+) | (+) | (+) | 46 | Alive | 6.57 |
| TARGET-10-PATCUK | M | 12.04 | T Cell ALL | 1 | (+) | (+) | (+) | (+) | (+) | 46 | Alive | 6.14 |
| TARGET-10-PATCZN | F | 4.94  | T Cell ALL | 1 | NA  | NA  | (+) | NA  | NA  | 46 | Alive | 6.30 |
| TARGET-10-PATDBU | M | 9.72  | T Cell ALL | 2 | NA  | (+) | (+) | (+) | (+) | 46 | Alive | 6.39 |
| TARGET-10-PATDDZ | M | 12.59 | T Cell ALL | 1 | (+) | (+) | (+) | (+) | (+) | 46 | Alive | 5.98 |
| TARGET-10-PATDFE | F | 5.02  | T Cell ALL | 1 | NA  | NA  | (+) | (+) | NA  | 46 | Alive | 6.48 |
| TARGET-10-PATDGZ | M | 2.57  | T Cell ALL | 1 | (+) | (+) | (+) | (+) | (+) | 46 | Alive | 6.36 |
| TARGET-10-PATDLG | M | 11.79 | T Cell ALL | 1 | (+) | (+) | (+) | (+) | (+) | 46 | Alive | 6.44 |
| TARGET-10-PATDMN | M | 6.92  | T Cell ALL | 1 | NA  | NA  | (+) | NA  | NA  | 46 | Alive | 6.36 |
| TARGET-10-PATEFF | M | 6.48  | T Cell ALL | 3 | NA  | (+) | (+) | (+) | (+) | 46 | Alive | 5.79 |
| TARGET-10-PATEIT | F | 9.54  | T Cell ALL | 2 | (+) | (+) | (+) | (+) | (+) | 46 | Dead  | 1.66 |
| TARGET-10-PATENL | M | 3.68  | T Cell ALL | 1 | NA  | (+) | (+) | (+) | (+) | 46 | Dead  | 1.66 |
| TARGET-10-PATEVL | M | 3.36  | T Cell ALL | 2 | NA  | (+) | (+) | (+) | (+) | 46 | Alive | 6.40 |
| TARGET-10-PATEYS | M | 5.23  | T Cell ALL | 3 | (+) | NA  | (+) | (+) | (+) | 46 | Alive | 5.29 |
| TARGET-10-PATFJD | F | 2.52  | T Cell ALL | 1 | NA  | (+) | (+) | (+) | (+) | 47 | Alive | 6.28 |



|                  |   |       |            |   |     |     |     |     |     |    |       |      |
|------------------|---|-------|------------|---|-----|-----|-----|-----|-----|----|-------|------|
| TARGET-10-PATFJP | M | 8.90  | T Cell ALL | 1 | (+) | (+) | (+) | (+) | (+) | 47 | Alive | 5.54 |
| TARGET-10-PATFVG | M | 5.83  | T Cell ALL | 1 | NA  | NA  | (+) | NA  | NA  | 46 | Alive | 6.00 |
| TARGET-10-PATGKE | M | 11.50 | T Cell ALL | 1 | NA  | NA  | (+) | NA  | NA  | 46 | Alive | 5.49 |
| TARGET-10-PATGLV | M | 6.18  | T Cell ALL | 1 | (+) | (+) | (+) | (+) | (+) | 46 | Alive | 6.27 |
| TARGET-10-PATGMP | M | 10.74 | T Cell ALL | 1 | (+) | (+) | (+) | (+) | (+) | 46 | Alive | 5.97 |
| TARGET-10-PATGVX | M | 7.30  | T Cell ALL | 1 | (+) | (+) | (+) | (+) | (+) | 46 | Alive | 6.31 |
| TARGET-10-PATGWP | M | 14.21 | T Cell ALL | 1 | NA  | (+) | (+) | (+) | (+) | 45 | Alive | 6.03 |
| TARGET-10-PATGXS | F | 13.89 | T Cell ALL | 1 | (+) | NA  | (+) | (+) | (+) | NA | Alive | 5.85 |
| TARGET-10-PATGZA | F | 14.38 | T Cell ALL | 2 | NA  | (+) | (+) | (+) | (+) | 47 | Alive | 5.98 |
| TARGET-10-PATHBG | F | 2.96  | T Cell ALL | 1 | (+) | (+) | (+) | (+) | (+) | 46 | Alive | 5.96 |
| TARGET-10-PATHFE | M | 11.17 | T Cell ALL | 1 | NA  | (+) | (+) | (+) | (+) | 46 | Alive | 5.96 |
| TARGET-10-PATHGY | M | 3.61  | T Cell ALL | 2 | (+) | (+) | (+) | (+) | (+) | 46 | Alive | 5.82 |
| TARGET-10-PATHJF | F | 10.25 | T Cell ALL | 1 | (+) | NA  | (+) | (+) | (+) | NA | Alive | 5.58 |
| TARGET-10-PATHRF | M | 5.17  | T Cell ALL | 1 | NA  | NA  | (+) | (+) | NA  | NA | Alive | 6.27 |
| TARGET-10-PATHWV | M | 8.56  | T Cell ALL | 2 | (+) | (+) | (+) | (+) | (+) | 46 | Alive | 6.17 |
| TARGET-10-PATIBE | F | 11.24 | T Cell ALL | 2 | NA  | (+) | (+) | (+) | (+) | 47 | Alive | 5.82 |
| TARGET-10-PATITY | M | 8.56  | T Cell ALL | 2 | NA  | (+) | (+) | (+) | (+) | 46 | Alive | 5.90 |
| TARGET-10-PATJBC | M | 5.33  | T Cell ALL | 1 | NA  | (+) | (+) | (+) | (+) | 47 | Alive | 6.03 |
| TARGET-10-PATJLT | M | 12.09 | T Cell ALL | 3 | (+) | (+) | (+) | (+) | (+) | 46 | Alive | 6.03 |
| TARGET-10-PATKGP | F | 10.57 | T Cell ALL | 3 | (+) | NA  | (+) | (+) | (+) | 46 | Alive | 5.93 |
| TARGET-10-PATKVD | M | 2.48  | T Cell ALL | 1 | NA  | NA  | (+) | (+) | NA  | NA | Alive | 5.89 |

|                  |   |       |            |   |     |     |     |     |     |    |       |      |
|------------------|---|-------|------------|---|-----|-----|-----|-----|-----|----|-------|------|
| TARGET-10-PATKWU | M | 13.23 | T Cell ALL | 2 | (+) | (+) | (+) | (+) | (+) | 46 | Alive | 5.70 |
| TARGET-10-PATLGU | M | 7.06  | T Cell ALL | 2 | NA  | NA  | (+) | NA  | NA  | 46 | Alive | 5.98 |
| TARGET-10-PATLHH | M | 7.75  | T Cell ALL | 1 | (+) | (+) | (+) | (+) | (+) | 46 | Alive | 5.92 |
| TARGET-10-PATLHS | M | 10.96 | T Cell ALL | 1 | NA  | NA  | (+) | NA  | NA  | NA | Alive | 4.25 |
| TARGET-10-PATLNS | F | 2.25  | T Cell ALL | 1 | NA  | (+) | (+) | (+) | (+) | 46 | Alive | 5.71 |
| TARGET-10-PATLNZ | M | 9.86  | T Cell ALL | 1 | NA  | (+) | (+) | (+) | (+) | 46 | Alive | 3.34 |
| TARGET-10-PATLRZ | M | 13.98 | T Cell ALL | 1 | (+) | (+) | (+) | (+) | (+) | 46 | Alive | 5.54 |
| TARGET-10-PATMRE | M | 6.77  | T Cell ALL | 1 | (+) | (+) | (+) | (+) | (+) | 46 | Alive | 5.75 |
| TARGET-10-PATMTV | M | 11.07 | T Cell ALL | 2 | NA  | (+) | (+) | (+) | (+) | 46 | Alive | 5.97 |
| TARGET-10-PATMXN | M | 14.92 | T Cell ALL | 1 | (+) | (+) | (+) | (+) | (+) | 46 | Alive | 3.26 |
| TARGET-10-PATMYZ | M | 12.10 | T Cell ALL | 1 | NA  | (+) | (+) | (+) | (+) | 46 | Alive | 5.77 |
| TARGET-10-PATNAM | F | 2.23  | T Cell ALL | 1 | NA  | (+) | (+) | (+) | (+) | 46 | Alive | 5.90 |
| TARGET-10-PATNIA | F | 6.57  | T Cell ALL | 1 | NA  | (+) | (+) | (+) | (+) | 46 | Alive | 5.89 |
| TARGET-10-PATPDA | M | 2.05  | T Cell ALL | 2 | (+) | (+) | (+) | (+) | (+) | 46 | Alive | 4.97 |
| TARGET-10-PATRAB | F | 4.67  | T Cell ALL | 2 | NA  | (+) | (+) | (+) | (+) | 46 | Alive | 5.88 |
| TARGET-10-PATRGV | F | 1.58  | T Cell ALL | 3 | NA  | (+) | (+) | (+) | (+) | 46 | Dead  | 4.60 |
| TARGET-10-PATRHL | M | 6.29  | T Cell ALL | 1 | NA  | (+) | (+) | (+) | (+) | 46 | Alive | 5.59 |
| TARGET-10-PATRNA | M | 2.20  | T Cell ALL | 2 | NA  | (+) | (+) | (+) | (+) | 46 | Alive | 5.69 |
| TARGET-10-PATRUN | M | 4.83  | T Cell ALL | 1 | NA  | (+) | (+) | (+) | (+) | 46 | Alive | 0.28 |
| TARGET-10-PATRXL | M | 4.84  | T Cell ALL | 2 | (+) | NA  | (+) | (+) | (+) | 46 | Alive | 4.91 |
| TARGET-10-PATSIY | M | 9.32  | T Cell ALL | 1 | NA  | (+) | (+) | (+) | (+) | 46 | Alive | 5.72 |
| TARGET-10-PATSLH | M | 2.26  | T Cell ALL | 1 | NA  | (+) | (+) | (+) | (+) | 46 | Alive | 4.95 |

|                  |   |       |            |   |     |     |     |     |     |    |       |      |
|------------------|---|-------|------------|---|-----|-----|-----|-----|-----|----|-------|------|
| TARGET-10-PATWHB | F | 10.69 | T Cell ALL | 3 | NA  | (+) | (+) | (+) | (+) | 46 | Alive | 5.24 |
| TARGET-10-PATWIJ | M | 14.20 | T Cell ALL | 1 | NA  | (+) | (+) | (+) | (+) | 92 | Alive | 5.31 |
| TARGET-10-PATWJU | M | 5.82  | T Cell ALL | 1 | NA  | (+) | (+) | (+) | (+) | 47 | Alive | 5.51 |
| TARGET-10-PATWYZ | M | 3.79  | T Cell ALL | 1 | NA  | (+) | (+) | (+) | (+) | 47 | Alive | 5.40 |
| TARGET-10-PATXNK | M | 9.39  | T Cell ALL | 1 | NA  | (+) | (+) | (+) | (+) | 45 | Alive | 5.11 |
| TARGET-10-PATXSK | M | 6.24  | T Cell ALL | 2 | NA  | (+) | (+) | (+) | (+) | 48 | Alive | 5.45 |
| TARGET-10-PATYCH | M | 3.92  | T Cell ALL | 1 | (+) | NA  | (+) | (+) | (+) | 46 | Alive | 5.08 |
| TARGET-10-PATYJK | M | 12.19 | T Cell ALL | 1 | NA  | (+) | (+) | (+) | (+) | 51 | Alive | 5.35 |
| TARGET-10-PATYWV | M | 7.66  | T Cell ALL | 1 | NA  | (+) | (+) | (+) | (+) | 46 | Dead  | 4.51 |
| TARGET-10-PATZFF | F | 10.69 | T Cell ALL | 1 | NA  | (+) | (+) | (+) | (+) | 46 | Alive | 5.02 |
| TARGET-10-PATZSL | F | 10.03 | T Cell ALL | 1 | (+) | (+) | (+) | (+) | (+) | 46 | Alive | 5.19 |
| TARGET-10-PATZVD | M | 4.16  | T Cell ALL | 1 | NA  | NA  | (+) | NA  | NA  | 46 | Alive | 5.22 |
| TARGET-10-PATZYC | M | 3.70  | T Cell ALL | 1 | (+) | (+) | (+) | (+) | (+) | 46 | Alive | 5.15 |
| TARGET-10-PAUACG | M | 4.95  | T Cell ALL | 1 | (+) | (+) | (+) | (+) | (+) | 46 | Alive | 4.87 |
| TARGET-10-PAUAFN | M | 3.93  | T Cell ALL | 2 | NA  | (+) | (+) | (+) | (+) | 46 | Alive | 5.08 |
| TARGET-10-PAUAJA | M | 11.89 | T Cell ALL | 1 | (+) | (+) | (+) | (+) | (+) | 46 | Alive | 5.13 |
| TARGET-10-PAUAZV | M | 8.32  | T Cell ALL | 1 | NA  | (+) | (+) | (+) | (+) | 46 | Alive | 4.95 |
| TARGET-10-PAUBCT | M | 13.02 | T Cell ALL | 1 | NA  | (+) | (+) | (+) | (+) | 46 | Alive | 5.05 |
| TARGET-10-PAUBLL | F | 7.16  | T Cell ALL | 1 | NA  | NA  | (+) | NA  | NA  | NA | Alive | 5.24 |
| TARGET-10-PAUBPY | M | 11.55 | T Cell ALL | 1 | (+) | (+) | (+) | (+) | (+) | 46 | Alive | 5.03 |
| TARGET-10-PAUBTC | F | 1.83  | T Cell ALL | 3 | NA  | NA  | (+) | (+) | NA  | NA | Alive | 5.02 |
| TARGET-10-PAUBXP | M | 8.31  | T Cell ALL | 1 | (+) | (+) | (+) | (+) | (+) | 45 | Alive | 4.78 |
| TARGET-10-PAUCDY | M | 9.94  | T Cell ALL | 1 | (+) | (+) | (+) | (+) | (+) | 46 | Alive | 4.91 |
